# Supplementary material for: Myeloid-derived grancalcin instigates obesity-induced insulin resistance and metabolic inflammation in male mice
Source: PubMed Central journal article supplement (PMC10762069; doi:10.1038/s41467-023-43787-x), 2024-01-02
Supplement: 41467_2023_43787_MOESM1_ESM.pdf [file 41467_2023_43787_MOESM1_ESM.pdf]

## Supplementary Materials for

# **Myeloid-derived grancalcin instigates obesity-induced insulin resistance and metabolic inflammation in male mice**

Tian Su<sup>1,#</sup>, Yue He<sup>1,#</sup>, Yan Huang<sup>1</sup>, Mingsheng Ye<sup>1</sup>, Qi Guo<sup>1</sup>, Ye Xiao<sup>1</sup>, Guangping Cai, Linyun Chen<sup>1</sup>, Changjun Li, Haiyan Zhou<sup>1,\*</sup>, Xianghang Luo<sup>1,2,3,5,\*</sup>

<sup>1</sup> Endocrinology Research Center, Xiangya Hospital of Central South University, Changsha, Hunan, 410008, China.

<sup>2</sup> National Clinical Research Center for Geriatric Disorders, Xiangya Hospital, Changsha, Hunan 410008, China.

<sup>3</sup> Key Laboratory of Organ Injury, Aging and Regenerative Medicine of Hunan Province, Hunan, 410008, China.

#These authors contributed equally

\* Corresponding authors

Correspondence and request for reprints should be addressed to:

Prof. Xianghang Luo,

E-mail: [xianghangluo@csu.edu.cn](mailto:xianghangluo@csu.edu.cn);

Dr. Haiyan Zhou,

E-mail: [hyzhou02@csu.edu.cn](mailto:hyzhou02@csu.edu.cn)

**The PDF file includes:**

Supplementary Figures 1 to 8

Supplementary Tables 1 to 2

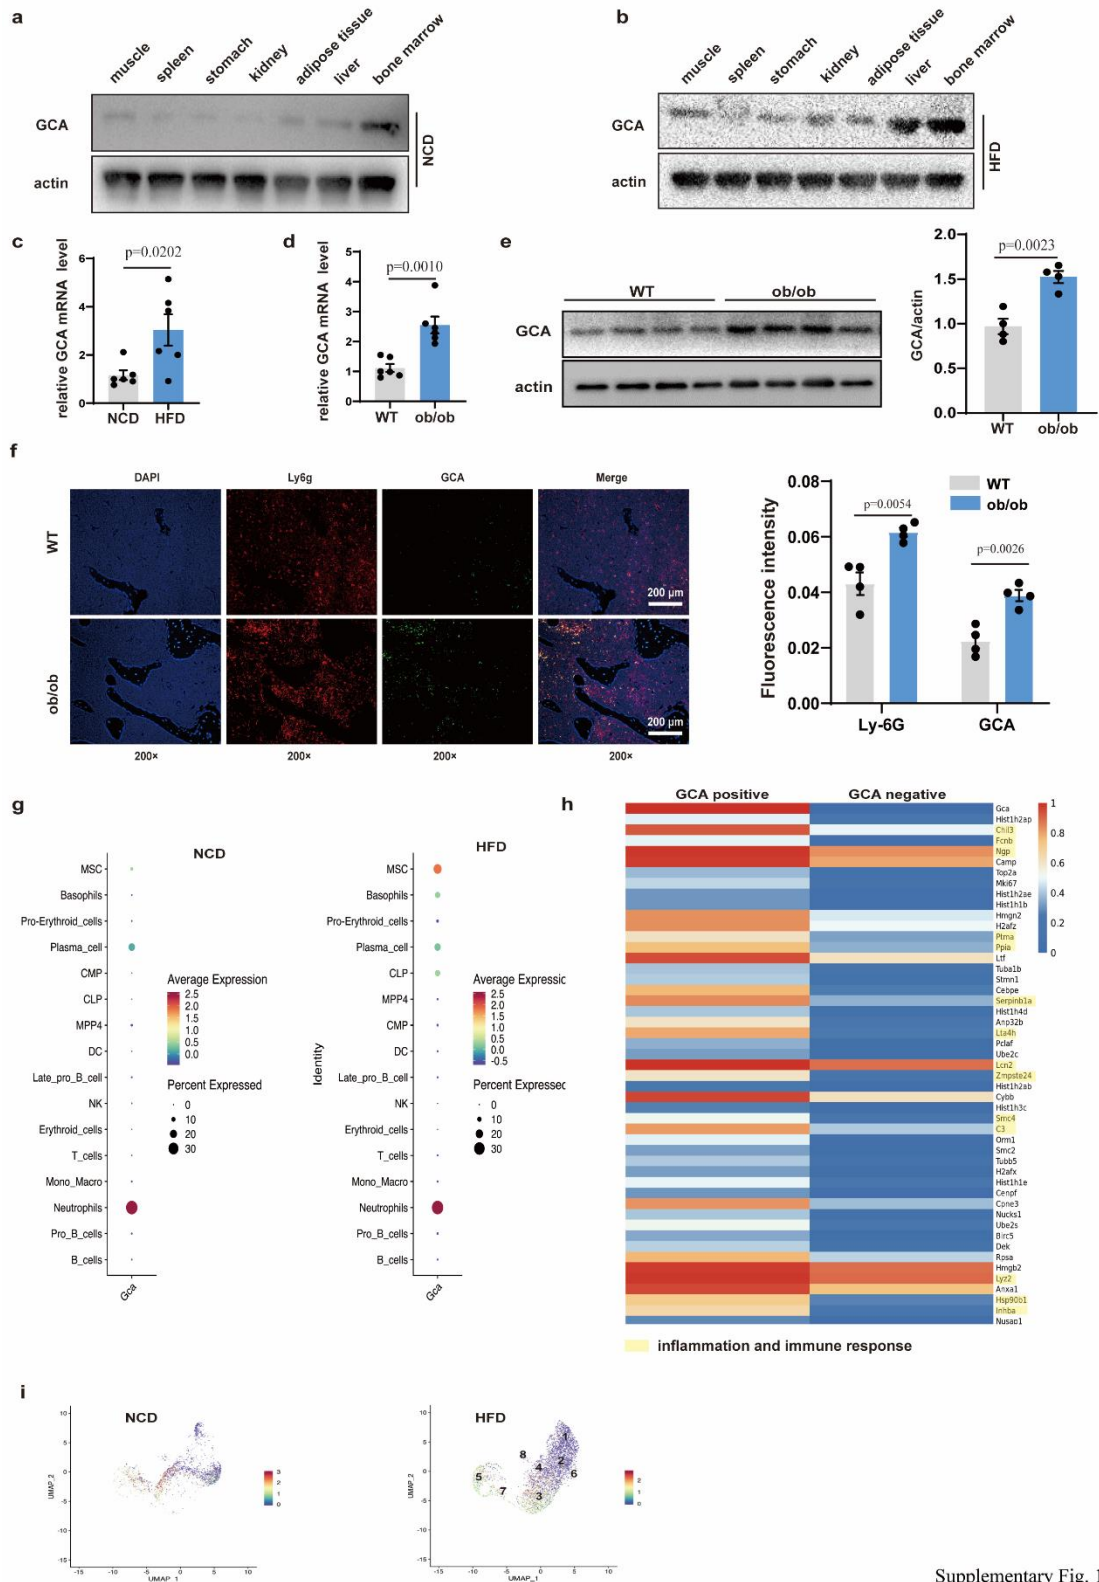

Supplementary Fig. 1

**Supplementary Figure 1 Obesity induces a dynamic increase of GCA+ immune cells in the bone marrow.**

**(a)** GCA protein expression levels in multiple tissues of 18 weeks old WT mice fed with NCD (n = 3).

**(b)** GCA protein expression levels in multiple tissues of WT mice fed with HFD for 12 weeks (n = 3).

**(c-d)** *Gca* mRNA expression levels in the bone marrow of HFD induced mice and genetically obese (ob/ob) mice (n = 6).

**(e)** Western Blot of GCA protein level in the bone marrow of genetically obese (ob/ob) mice(n=4) (left, representative pictures of Western blot; right, quantitative measurements of GCA proteins).

**(f)** Immunofluorescent staining of GCA (green) and Ly6g(red) in the bone section of ob/ob mice(n=4) (top, representative pictures of Immunofluorescent staining; bottom, quantitative measurements of Ly6g and GCA proteins). Scale bar as indicated in the picture.

**(g)** Dotplot shows gene expression of *Gca* genes in cell populations of NCD mice and HFD mice.

**(h)** The heatmap of 50 most upregulated genes in GCA-positive vs GCA-negative neutrophils.

**(i)** T-distributed stochastic neighbor embedding (tSNE) plot shows different clustering of bone marrow neutrophils from NCD mice and HFD mice based on gene expression.

Data are presented as means  $\pm$  SEM. n indicates the number of biologically independent samples examined. Statistical analysis was assessed by two-sided Student's t test and significant differences were indicated with p values. Source data are provided as a Source Data File.

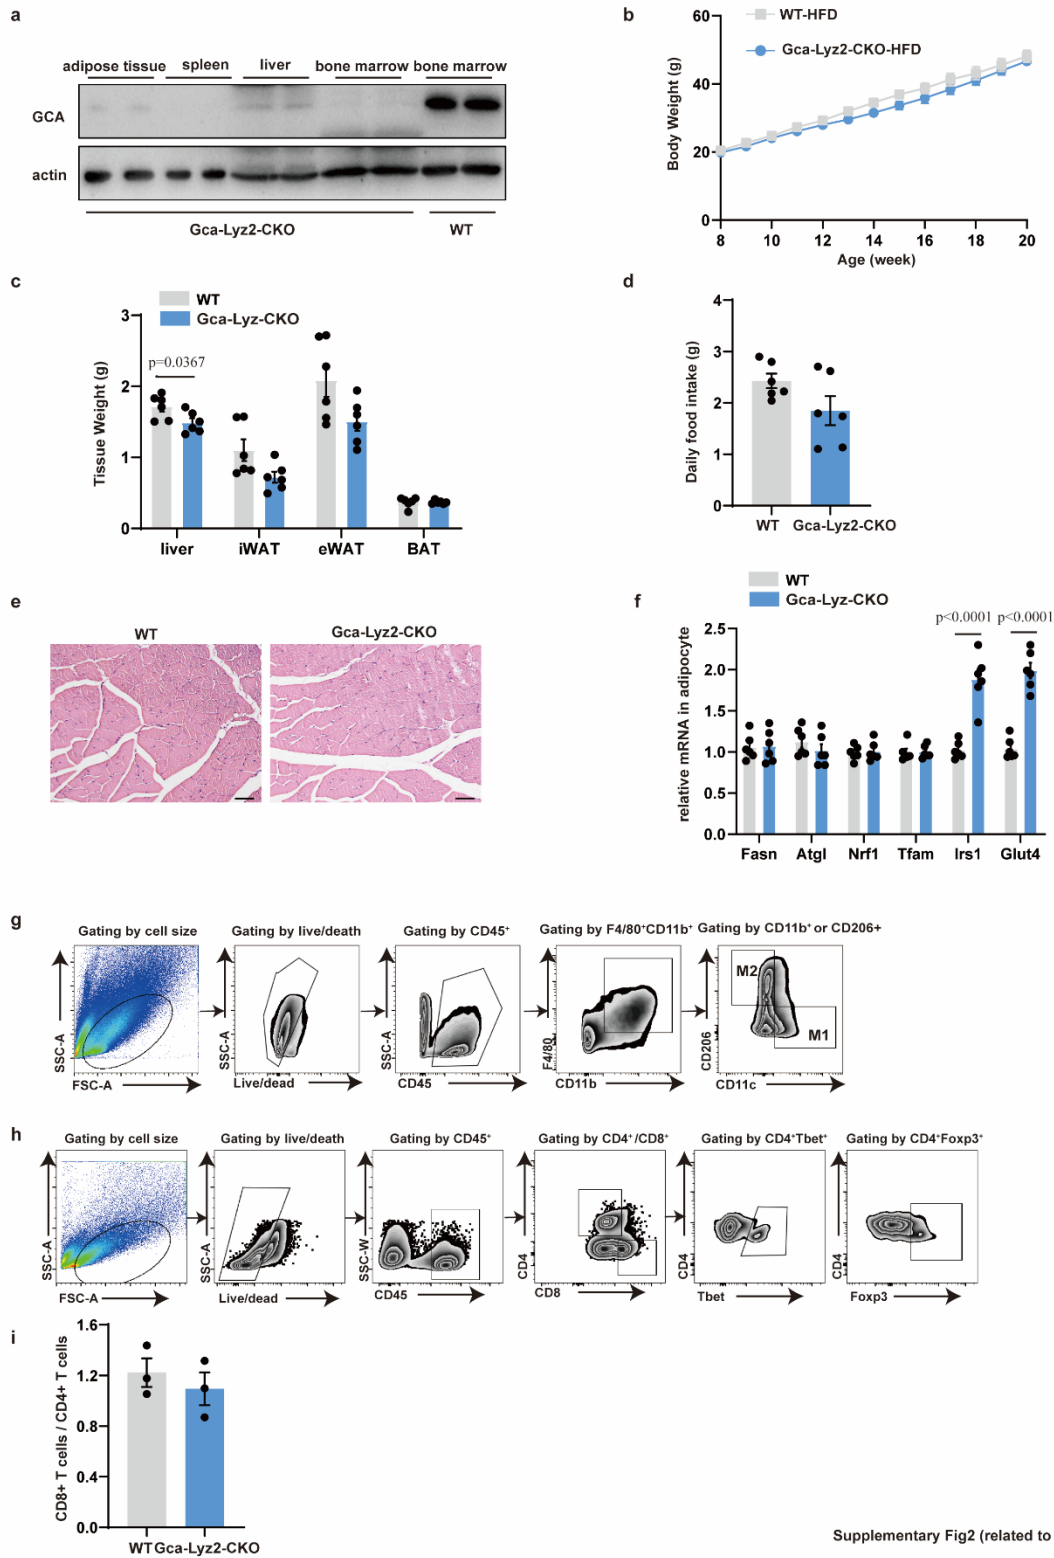

**Supplementary Figure 2 GCA deficiency in myeloid lineage meliorates adipose tissue inflammation and glucose metabolism.**

(a) GCA expression in bone marrow, eWAT, liver and spleen of WT and Gca-Lyz2-CKO mice as assessed by western blotting.

- (b)** Body weight of male WT and Gca-Lyz2-CKO mice fed with HFD for 12 weeks (n =6).
- (c)** Weight of liver, eWAT, iWAT and BAT in male WT and Gca-Lyz2-CKO mice fed with HFD for 12 weeks (n =6).
- (d)** The daily food intake of male WT mice and Gca-Lyz2-CKO mice fed with HFD for 12 weeks (n =6).
- (e)** HE staining of muscle from male WT mice and Gca-Lyz2-CKO mice fed with HFD for 12 weeks (n=3).
- (f)** Relative mRNA levels of lipid synthesis (Fasn), lipolysis (Atgl), mitochondrial biogenesis (Nrf1 and Tfam) and insulin action (Irs1 and Glut4) genes in adipocytes from male WT and Gca-Lyz2-CKO mice fed with HFD for 12 weeks (n =6).
- (g)** The gating strategies for the macrophage flow cytometry as shown in Figure 2o.
- (h)** The gating strategies for the T cells flow cytometry as shown in Figure 2q.
- (i)** Flow cytometry analysis of CD4<sup>+</sup> T cells and CD8<sup>+</sup> T cell in eWAT from male WT and Gca-Lyz2-CKO mice fed with HFD for 12 weeks (n =3).

Data are presented as means  $\pm$  SEM. n indicates the number of biologically independent samples examined. Statistical analysis was assessed by two-sided Student's t test (c, d, f and i) or two-way ANOVA followed with Sidak's multiple comparisons test (b) and significant differences were indicated with p values. Source data are provided as a Source Data File.

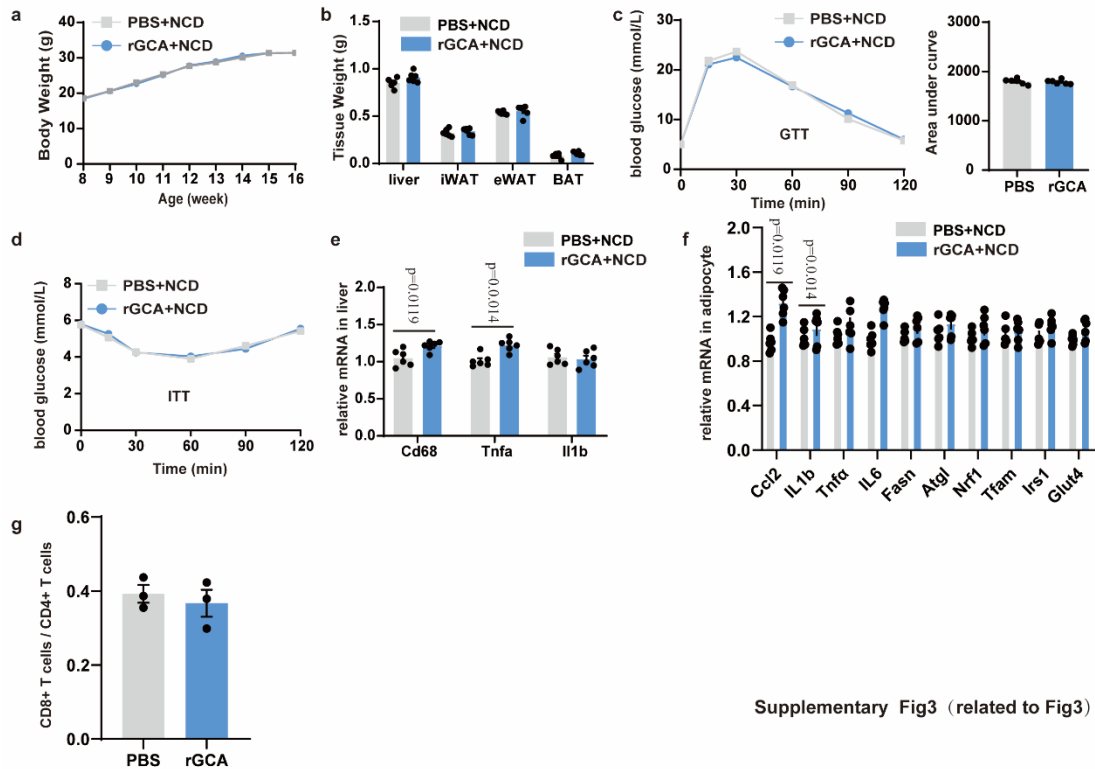

Supplementary Fig3 (related to Fig3)

### Supplementary Figure 3 GCA exacerbates adipose tissue inflammation in NCD-fed mice.

- (a)** Body weight gain of NCD-fed animals treated with PBS or rGCA (n=6).
- (b)** Weight of Liver, eWAT, iWAT and BAT in NCD-fed animals treated with PBS or rGCA (n=6).
- (c-d)** GTT and ITT of NCD-fed mice treated with PBS or rGCA (n = 6).
- (e)** QPCR analysis of inflammatory cytokine gene expression levels in liver from NCD-fed animals treated with PBS or rGCA (n=6).
- (f)** Relative mRNA levels of inflammatory cytokine gene, lipid synthesis (Fasn), lipolysis (Atgl), mitochondrial biogenesis (Nrfl and Tfam) and insulin action (Irs1 and Glut4) genes in adipocytes from NCD-fed animals treated with PBS or rGCA (n=6).
- (g)** Flow cytometry analysis of CD4<sup>+</sup> T cells and CD8<sup>+</sup> T cell in eWAT from NCD-fed animals treated with PBS or rGCA (n=3).

Data are presented as means  $\pm$  SEM. n indicates the number of biologically independent samples examined. Statistical analysis was assessed by two-sided Student's t test (**b**, **c(right)**, and **e-g**) or two-way ANOVA followed with Sidak's multiple comparisons test (**a**, **c(left)** and **d**) and significant differences were indicated with p values. Source data are provided as a Source Data File.

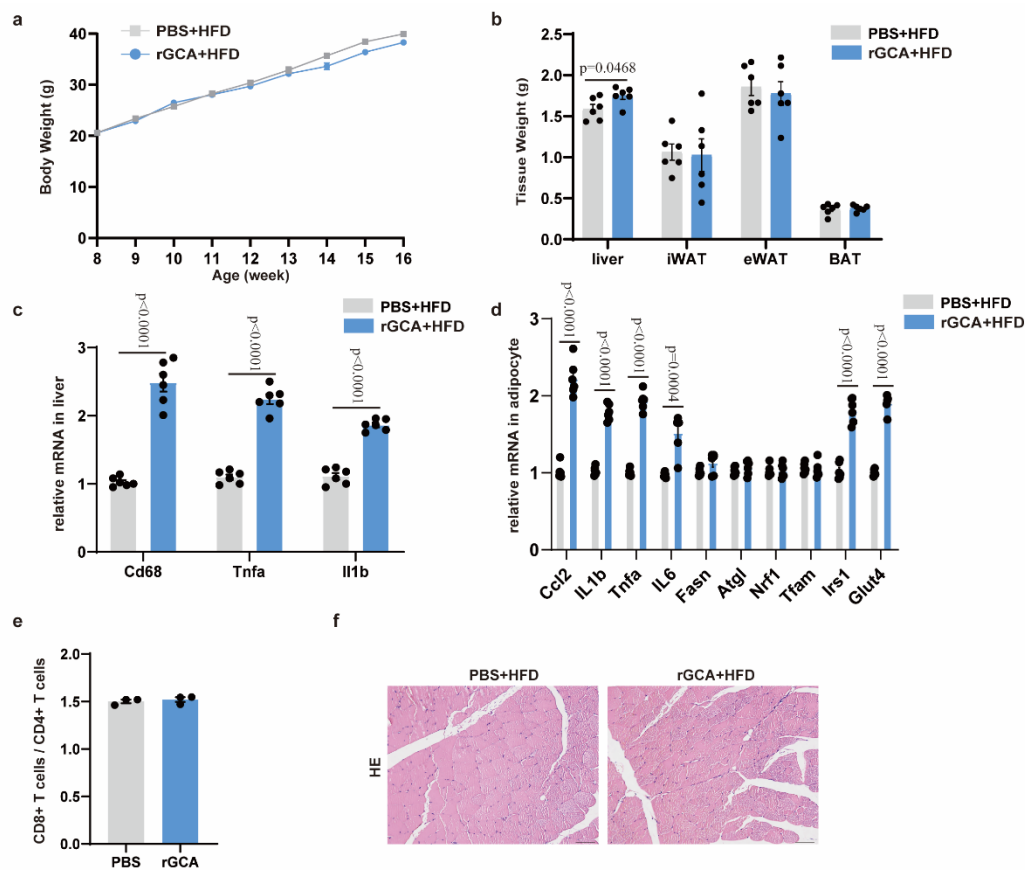

Supplementary Fig4 (related to Fig4)

**Supplementary Figure 4 GCA exacerbates adipose tissue inflammation, insulin resistance and glucose intolerance in HFD-fed mice.**

- (a) Body weight gain of HFD-fed animals treated with PBS or rGCA (n=6).
- (b) Weight of Liver, eWAT, iWAT and BAT in HFD-fed animals treated with PBS or rGCA (n=6).
- (c) QPCR analysis of inflammatory cytokine gene expression levels in liver from HFD-fed animals treated with PBS or rGCA (n=6).
- (d) Relative mRNA levels of inflammatory cytokine gene, lipid synthesis (Fasn), lipolysis (Atgl), mitochondrial biogenesis (Nrfl and Tfam) and insulin action (Irs1 and Glut4) genes in adipocytes from HFD-fed animals treated with PBS or rGCA (n=6).
- (e) Flow cytometry analysis of CD4<sup>+</sup> T cells and CD8<sup>+</sup> T cell in eWAT from HFD-fed animals treated with PBS or rGCA (n=3).
- (f) HE staining of muscle from HFD-fed animals treated with PBS or rGCA (n=3).

Data are presented as means  $\pm$  SEM. n indicates the number of biologically independent samples examined. Statistical analysis was assessed by two-sided Student's t test (b-e) or two-way ANOVA



followed with Sidak's multiple comparisons test (**a**) and significant differences were indicated with p values. Source data are provided as a Source Data File.

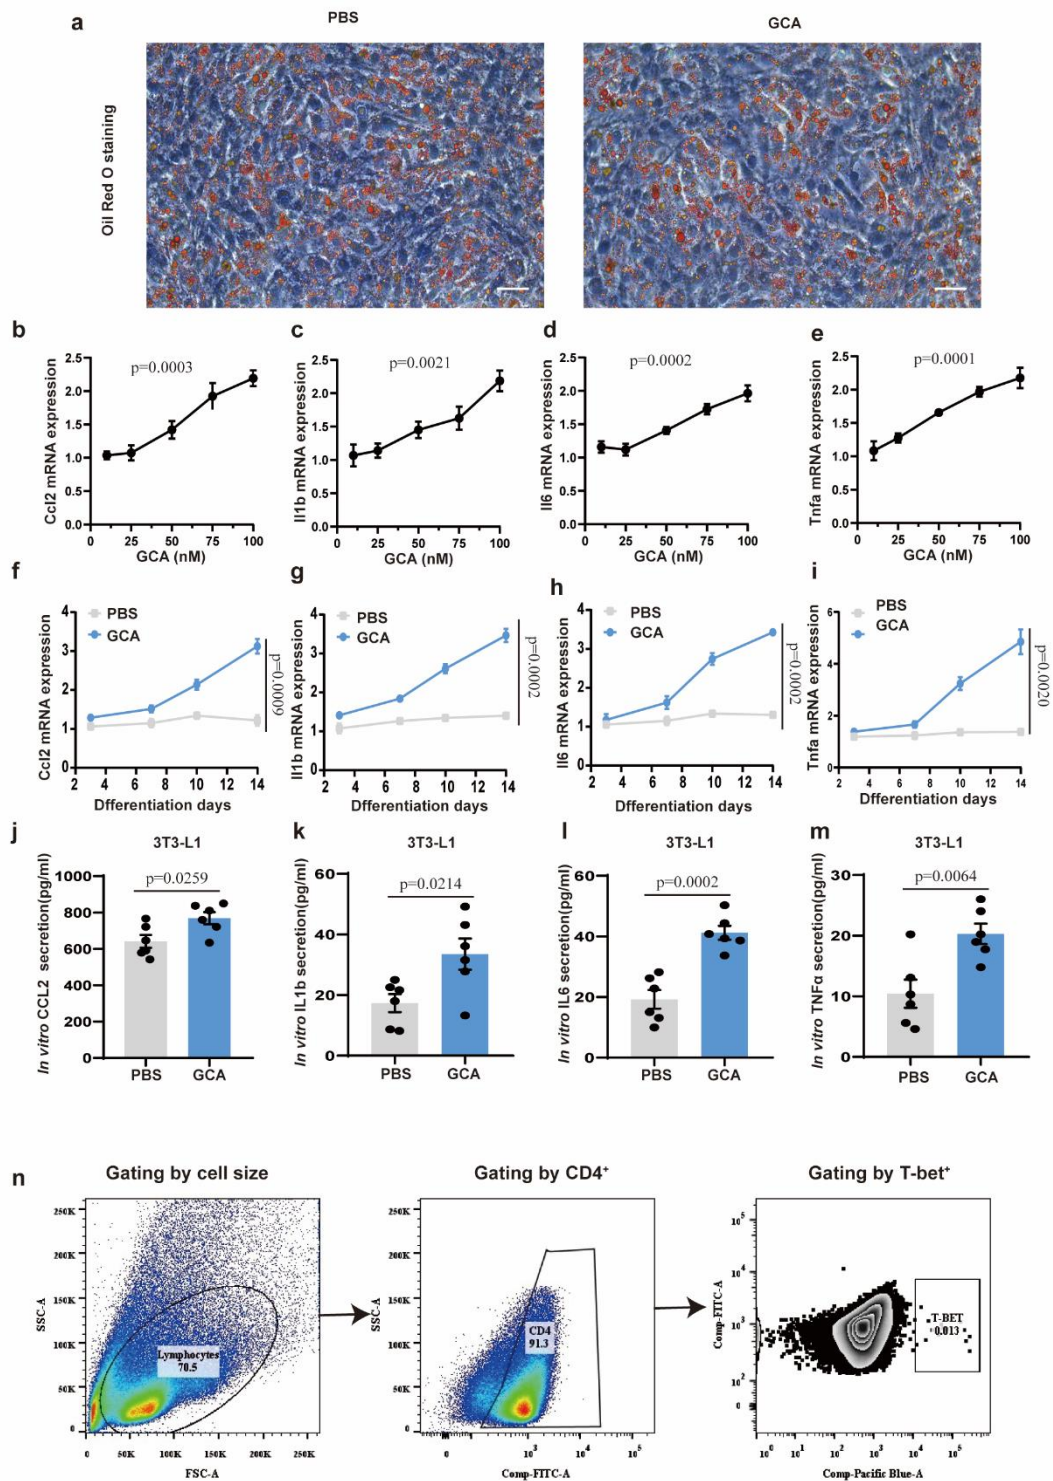

Supplementary Fig5 (related to Fig5)

### Supplementary Figure 5 GCA magnified inflammation in adipocytes in vitro.

(a) Oil Red O staining of 3T3-L1 adipocytes at day 14 of adipogenic induction differentiation process administrated with 100 nM GCA or PBS. Scale bar, 200  $\mu$ m.

(b-e) QPCR analysis of *Ccl2* (b), *Il1b* (c), *Il6* (d) and *Tnfa* (e) in differentiated 3T3-L1 adipocytes

administrated with GCA concentrations ranging from 10 to 100 nM.

**(f-i)** QPCR analysis of CCL2 **(f)**, IL1b **(g)**, IL6 **(h)** and TNF $\alpha$  **(i)** expression in 3T3-L1 adipocytes administrated with 100 nM GCA or PBS analyzed at four time points during adipogenic induction differentiation process.

**(j-m)** The protein secretion of CCL2 **(j)**, IL1b **(k)**, IL6 **(l)** and TNF $\alpha$ **(m)** at day 14 of adipogenic induction differentiation process in 3T3-L1 administrated with 100 nM GCA or PBS.

**(n)** The gating strategies of flow cytometry analyses for T cells after coculture assay.

Data are presented as means  $\pm$  SEM. n indicates the number of biologically independent samples examined. Statistical analysis was assessed by two-sided Student's t test **(j-m)**, one-way ANOVA with Tukey's multiple-comparison test (b-e) or two-way ANOVA followed with Sidak's multiple comparisons test (f-i) and significant differences were indicated with p values. Source data are provided as a Source Data File.

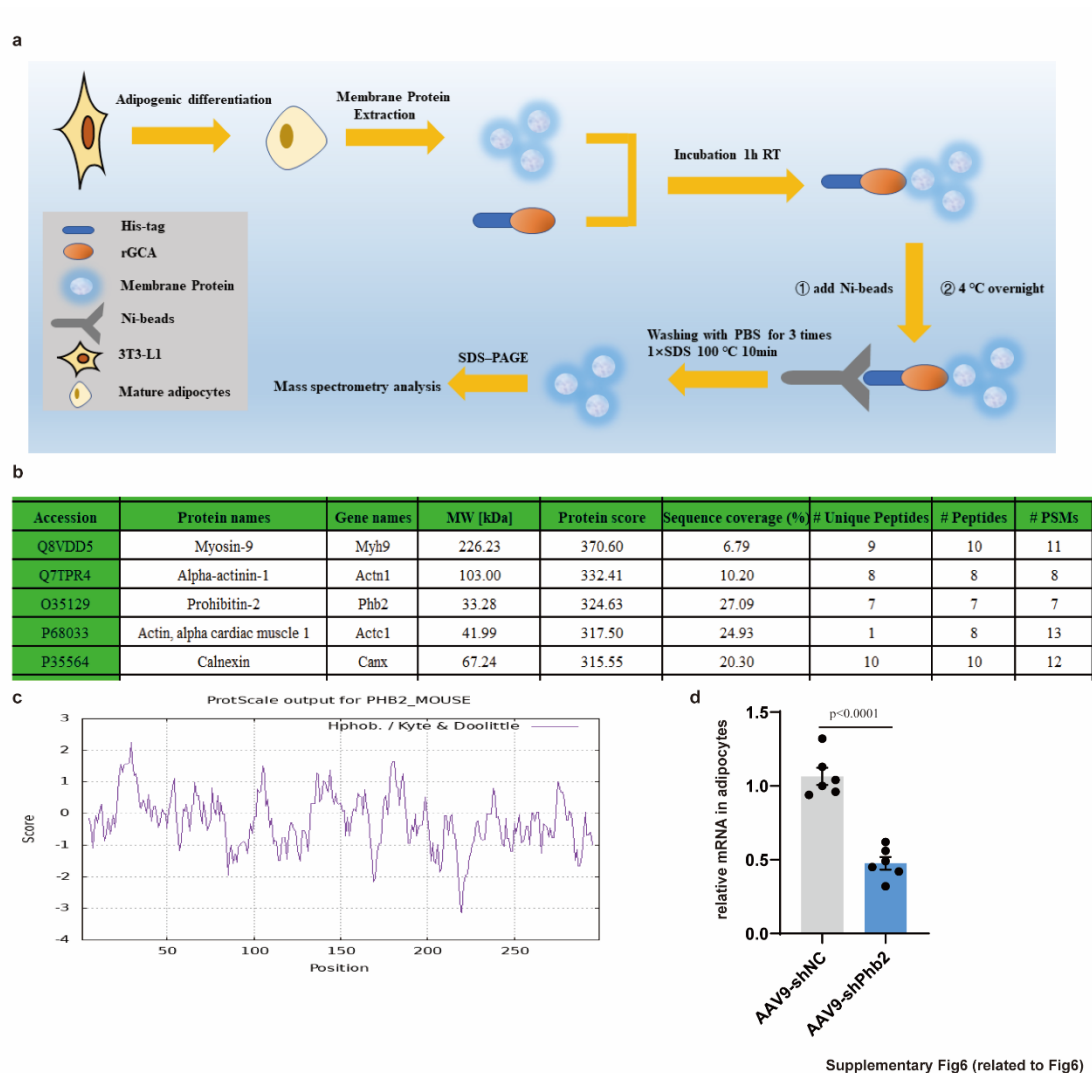

### Supplementary Figure 6 PHB2 is a functional receptor of GCA in adipocyte.

(a) Schematic of His-tagged GCA pull-down assays. This diagram was created with MedPeer.com.

(b) List of candidates with top 5 scores in LC-MS/MS analysis of 3T3-L1 with incubation of His-labeled GCA.

(c) Transmembrane helix prediction for PHB2 predicted by ProtScale (<https://web.expasy.org/protscale/>).

(d) qPCR analysis of Phb2 mRNA in AAV9-shNC mice and AAV9-shPhb2 mice one month after virus injection.

Data are presented as means  $\pm$  SEM. n indicates the number of biologically independent samples examined. Statistical analysis was assessed by two-sided Student's t test and significant differences were indicated with p values. Source data are provided as a Source Data File.

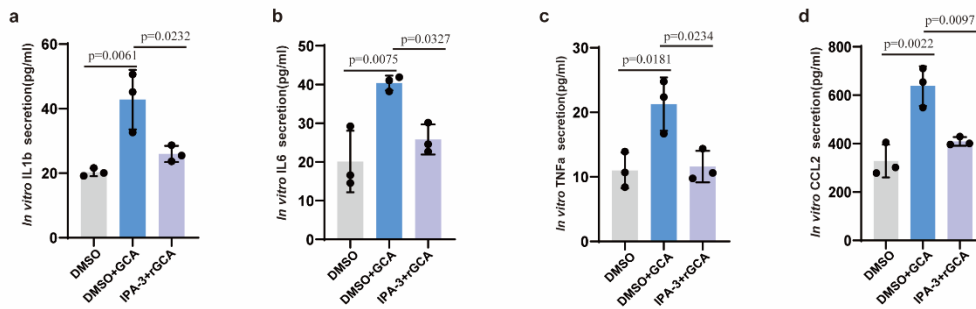

Supplementary Fig7(related to Fig7)

**Supplementary Figure 7 GCA promotes phosphorylation of PAK1-NF-κB downstream of PHB2 signaling.**

(a-d) ELISA of IL1b (a), IL6 (b), TNFα (c) and CCL2 (d) in differentiated 3T3-L1 adipocytes with addition of IPA-3 or DMSO and with or without GCA treatment(n=3).

Data are presented as means ± SEM. n indicates the number of biologically independent samples examined. Statistical significance was assessed by one-way ANOVA with Tukey's multiple-comparison test and significant differences were indicated with p values. Source data are provided as a Source Data File.

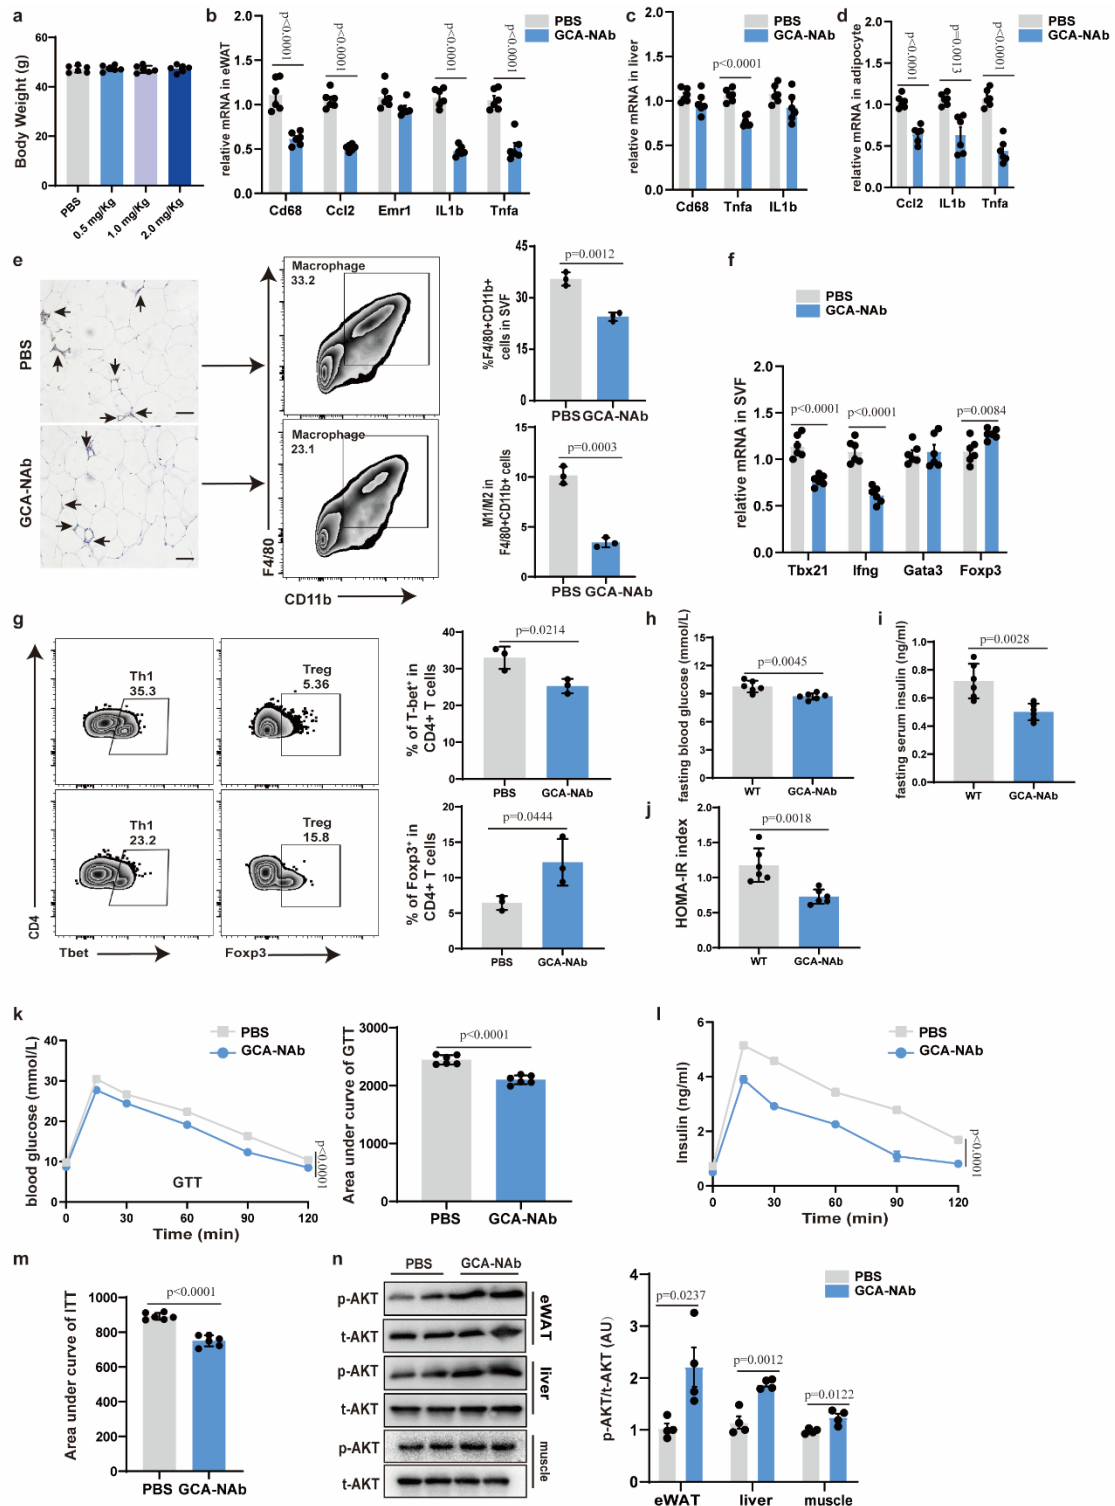

Supplementary Fig8 (related to Fig8)

**Supplementary Figure 8 GCA-neutralizing antibody improves adipose tissue inflammation and insulin sensitivity in DIO mice.**

(a) Body weight of DIO mice treated with PBS or different concentrations of GCA-Nab for 2

months (n=6).

**(b-d)** Inflammatory gene expression in eWAT(**a**), liver(**b**) and adipocyte(**c**) from ob/ob mice treated with PBS or GCA-NAb for 2 months (n=6).

**(e)** F4/80 immunohistochemistry and flow analyses of macrophage in eWAT from ob/ob mice treated with PBS or GCA-NAb for 2 months (n=3). Scale bar, 250 $\mu$ m.

**(f)** Gene expression in SVF from ob/ob mice treated with PBS or GCA-NAb for 2 months (n=6).

**(g)** Flow cytometry analysis of CD4<sup>+</sup>Tbet<sup>+</sup> Th1 cells and CD4<sup>+</sup>Foxp3<sup>+</sup> Treg cells in eWAT from ob/ob mice treated with PBS or GCA-NAb for 2 months (n=3).

**(h-j)** Fasting blood glucose, fasting insulin and HOMA-IR index of ob/ob mice treated with PBS or GCA-NAb for 2 months (n = 6).

**(k-l)** Time courses of blood glucose and serum insulin concentrations in ob/ob mice treated with PBS or GCA-NAb for 2 months (n = 6).

**(m)** ITT of ob/ob mice treated with PBS or GCA-NAb for 2 months (n = 6).

**(n)** Western Blot of insulin-stimulated AKT phosphorylation in eWAT, liver and muscle, and quantitation of pAKT/tAKT from ob/ob mice treated with PBS or GCA-NAb for 2 months (n=4).

Data are presented as means  $\pm$  SEM. n indicates the number of biologically independent samples examined. Statistical analysis was assessed by one-way ANOVA with Tukey's multiple-comparison test (**a**), two-sided Student's t test (**b-j**, **k(right)**, **m** and **n**) or two-way ANOVA followed with Sidak's multiple comparisons test (**k (left)**, **l**) and significant differences were indicated with p values.

Source data are provided as a Source Data File.

**Supplementary Table 1 Characteristics of the Study Population**

| Trait                          | individuals<br>without obesity<br>(n=12) | individuals with<br>obesity (n=38) |
|--------------------------------|------------------------------------------|------------------------------------|
| Age (years)                    | 25.75±2.20                               | 29.50±8.02                         |
| Male/female (n)                | 6/6                                      | 14/24                              |
| BMI (kg/m <sup>2</sup> )       | 20.19±1.69                               | 29.04±0.93                         |
| HOMA-IR                        | 1.04±0.07                                | 7.12±6.23                          |
| Fasting blood glucose (mmol/l) | 4.49±0.17                                | 5.77±0.88                          |
| 2h blood glucose (mmol/l)      | 5.49±0.28                                | 8.44±2.89                          |
| Fasting insulin<br>(μU/ml)     | 5.20±0.32                                | 26.72±21.30                        |
| 2h insulin(μU/ml)              | 23.35±3.66                               | 174.44±139.83                      |
| Cholesterol (mmol/l)           | 4.54±0.53                                | 5.91±0.77                          |
| Triglycerides (mmol/l)         | 1.48±0.11                                | 2.23±1.11                          |

Data are presented as mean±SEM.



**Supplementary Table 2 Nucleotide sequences of primers used for quantitative RT-PCR****detection in mouse**

| primer       | sequence (5' to 3')     |                          |
|--------------|-------------------------|--------------------------|
|              | Forward                 | Reverse                  |
| Cd68         | TGTCTGATCTTGCTAGGACCG   | GAGAGTAACGGCCTTTTTGTGA   |
| Ccl2         | TTAAAAACCTGGATCGGAACCAA | GCATTAGCTTCAGATTACGGGT   |
| IL1b         | CCCTGCAGCTGGAGAGTGTGGA  | CTGAGCGACCTGTCTTGCCG     |
| Emr1         | TGACTCACCTTGTGGTCCTAA   | CTTCCCAGAATCCAGTCTTCC    |
| IL6          | GCCCATCCTCTGTGACTCAT    | CAGAATTGCCATTGCACAAC     |
| Tnf $\alpha$ | AAGCCTGTAGCCACGTCGTA    | GGCACCCTAGTTGGTTGTCTTTG  |
| Gca          | GGGGCGTTTGGAAACTTCAG    | AGGGGAGTAGCTGTCAGAATAAC  |
| Ciita        | GCTGGGACGAAGACACCAA     | CACCTCCACGGATGAAAACC     |
| H2-EB1       | ACAGCCCAATGTCGTCACTC    | CCAGAGTGTTGTGGTGGTTGA    |
| Cd74         | CGCGACCTCATCTAACCAT     | ACAGGTTTGGCAGATTCGGA     |
| Tbx21        | AGCAAGGACGGCGAATGTT     | GTGGACATATAAGCGGTTCCC    |
| Ifng         | ATGAACGCTACACACTGCATC   | CCATCCTTTTGCCAGTTCCTC    |
| Gata3        | CCAGGCAAGATGAGAAAGAGTG  | ATAGGGCGGATAGGTGGTAATG   |
| Foxp3        | ACTCGCATGTTTCGCCTACTT   | AGGGATTGGAGCACTTGTTG     |
| Fasn         | AGAGATCCCGAGACGCTTCT    | GCTTGGTCCTTTGAAGTCGAAGA  |
| Atgl         | CAAGGGGTGCGCTATGTGGATGG | GAGGCGGTAGAGATTGCGAAGGTT |
| Nrf1         | AGCACGGAGTGACCCAAAC     | TGTACGTGGCTACATGGACCT    |
| Tfam         | ATTCCGAAGTGTTTTTCCAGCA  | TCTGAAAGTTTTGCATCTGGGT   |
| Irs1         | GCCAGAGGATCGTCAATAGC    | AAGACGTGAGGTCCTGGTTG     |
| Glut4        | TTGGAGAGAGAGCGTCCAAT    | TTGATGCCTGAGAGCTGTTG     |
